# Supplementary material for: Construction and Application of a Korean Reference Panel for Imputing Classical Alleles and Amino Acids of Human Leukocyte Antigen Genes
Source: PubMed Central journal article supplement (PMC4232350; doi:10.1371/journal.pone.0112546), 2014-11-14

### Figure S1. Dosage correlation between imputed and genotyped alleles

Imputed dosages (0 to 2) of 2-digit alleles (red) and 4-digit alleles (green) of *HLA-A*, *-B*, *-C*, *-DQB1*, and *-DRB1* in CHB+JPT HapMap individuals were compared with the actual dosage (0, 1 or 2). The correlation coefficient between the imputed and actual dosages of each allele was plotted according to its allelic frequency.

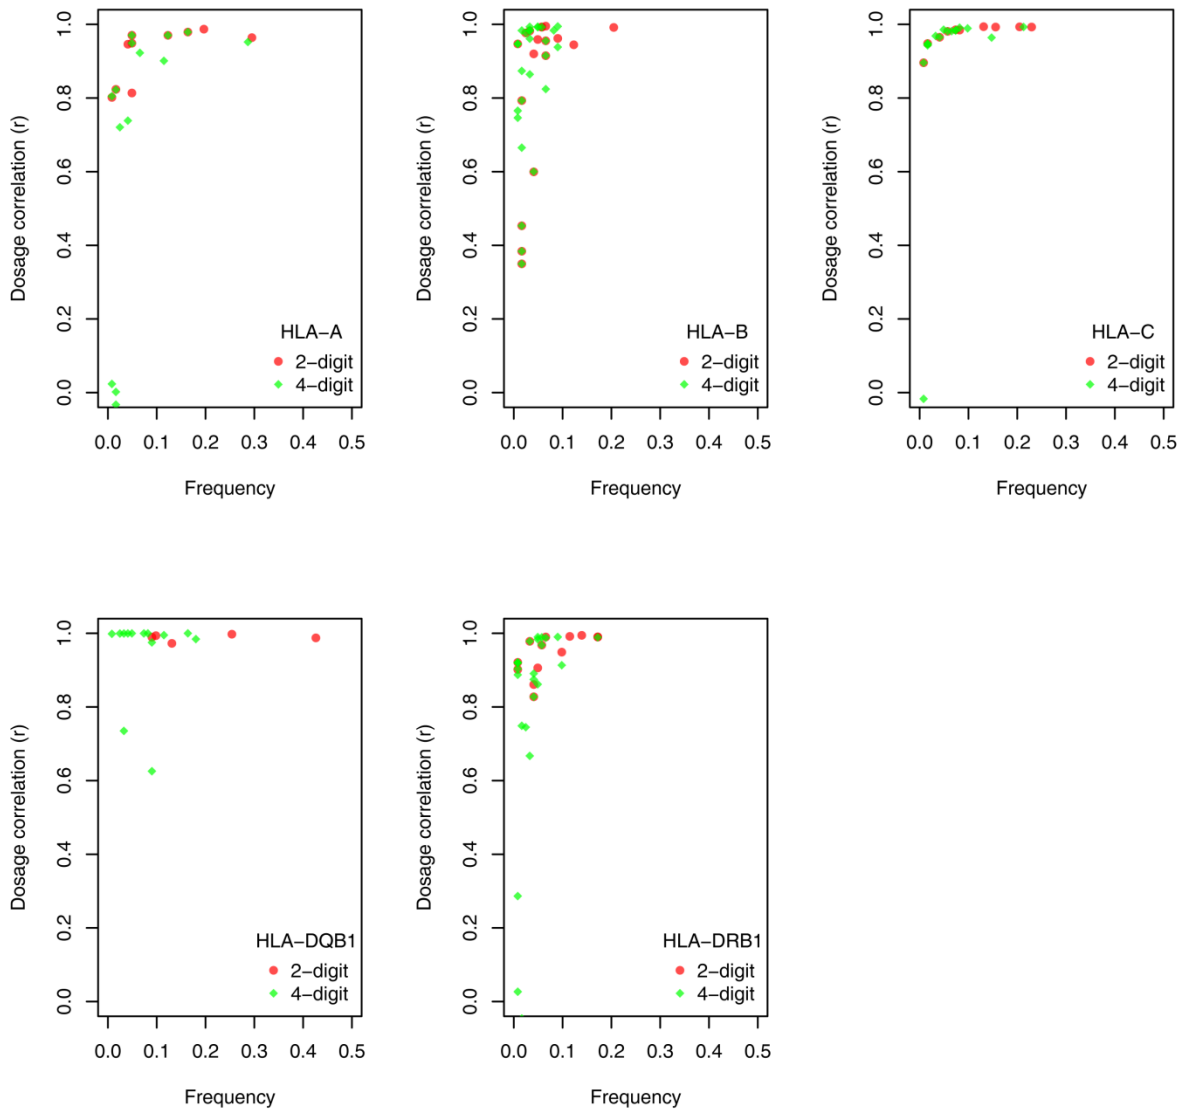

Supplement: pone.0112546.s001.pdf [file pone.0112546.s001.pdf]
